# Supplementary material
Source: Springer Nature journal article supplement (https://www.springermedizin.de/resource/supplementary/13054_2011_474_MOESM9_ESM.pdf/9708528)

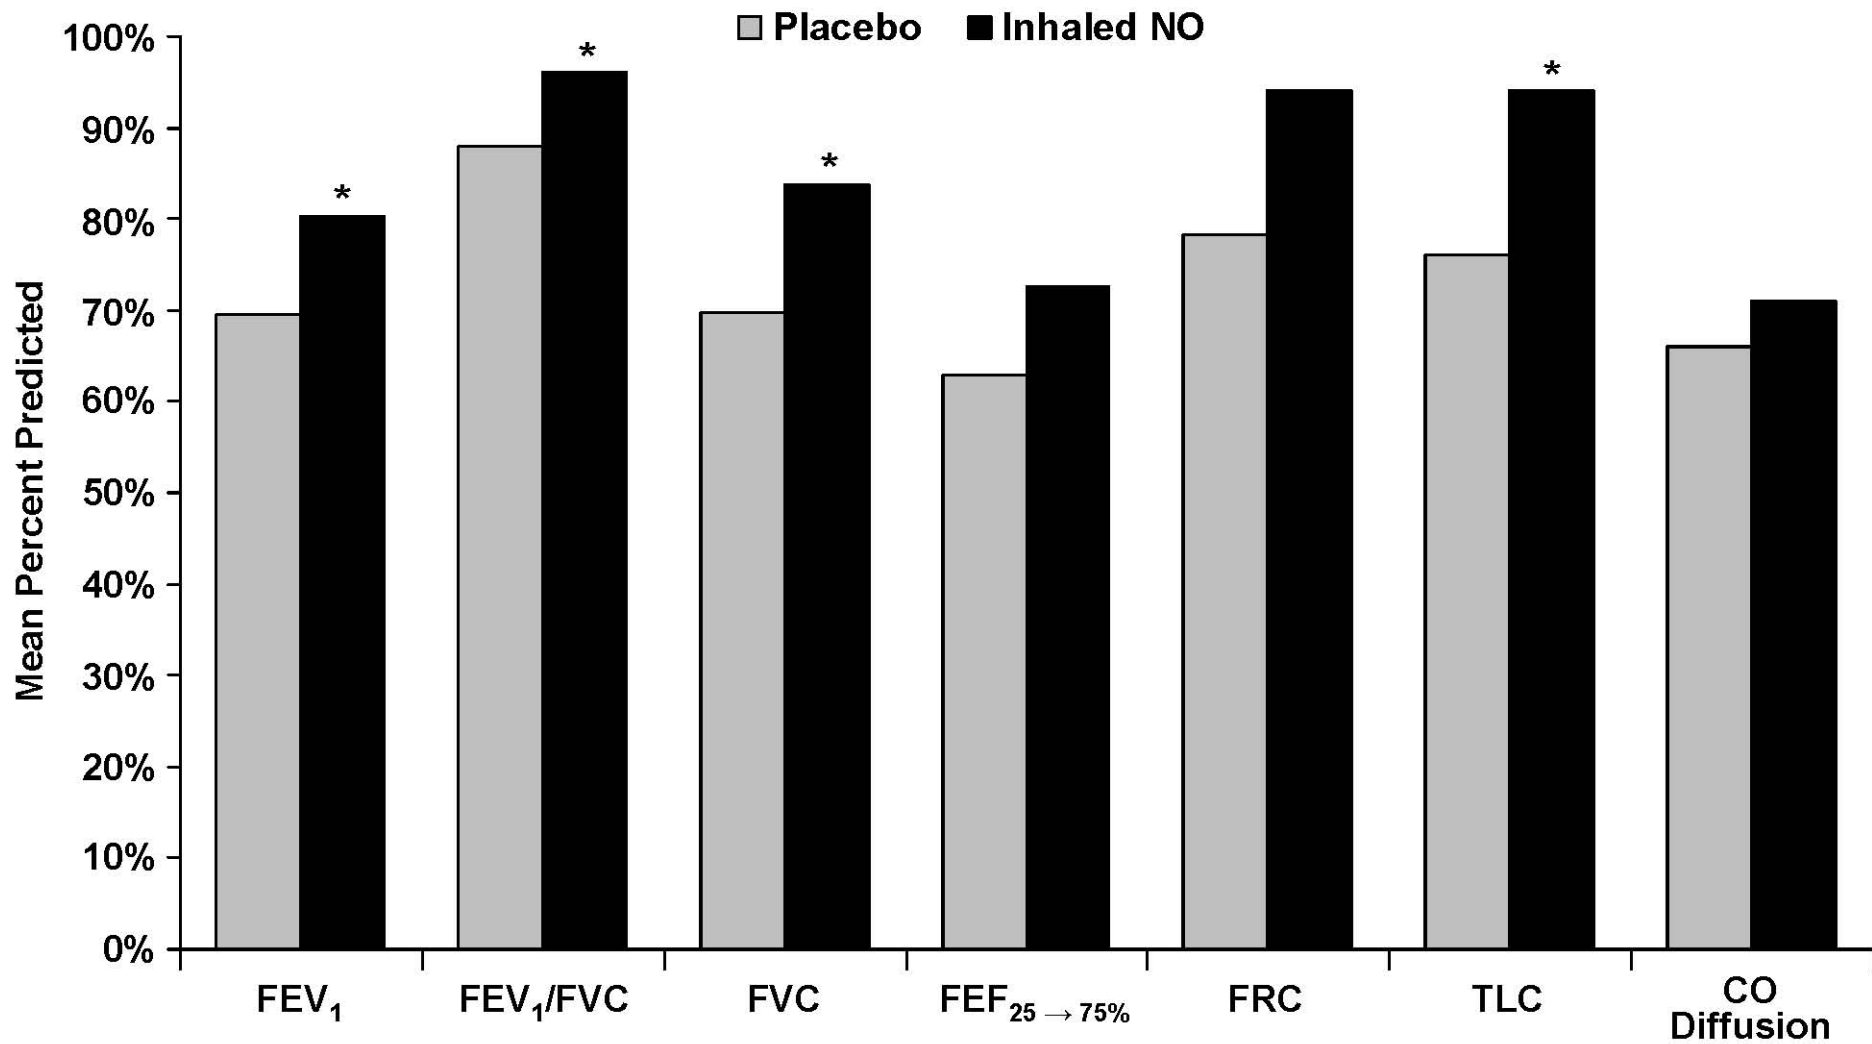

\* p < 0.05 versus placebo.

Supplement: MOESM9 [file 9708528]
